# Supplementary material for: Selection, Succession, and Stabilization of Soil Microbial Consortia
Source: mSystems. 2019 May 14;4(4):e00055-19. doi: 10.1128/mSystems.00055-19 (PMC6517688; doi:10.1128/mSystems.00055-19)
Supplement: FIG S2 [file mSystems.00055-19-sf002.pdf]

# CO<sub>2</sub> / per hour, Weeks 2:7

Control

10e-1 Dilution

10e-2 Dilution

10e-3 Dilution

10e-4 Dilution

Liquid Media

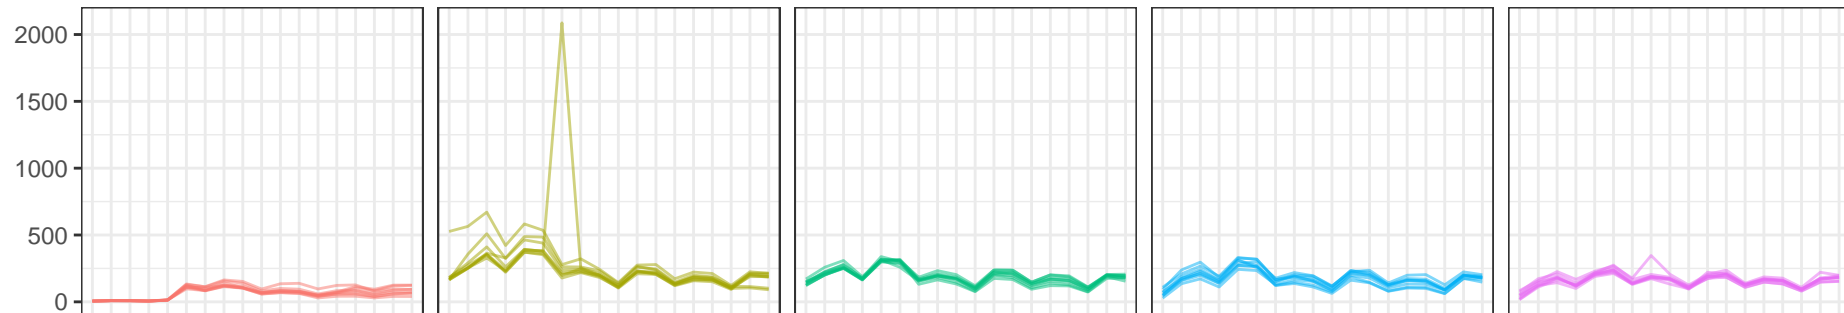

Soil

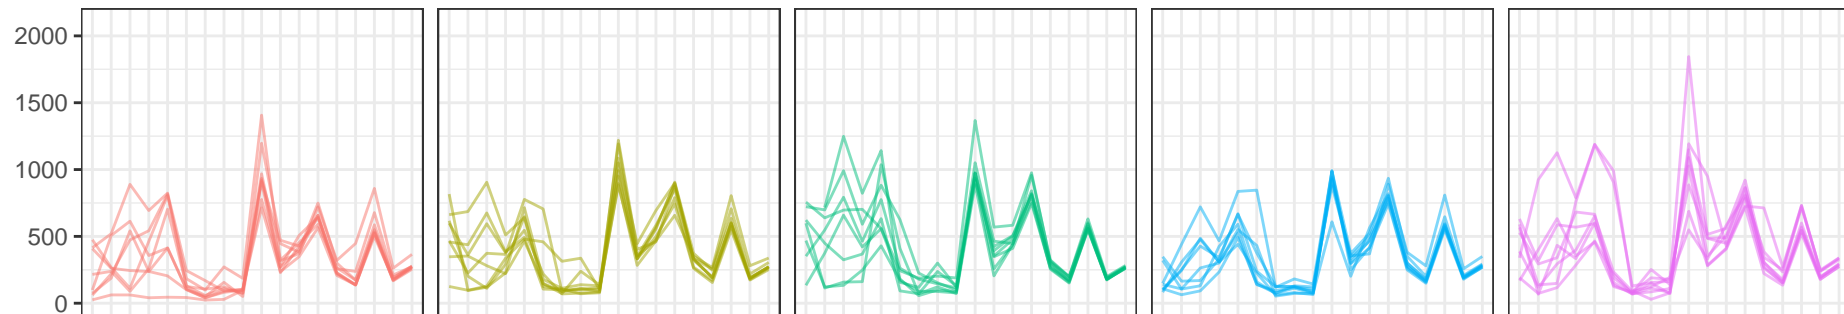

Weeks Incubated
