# Supplementary material for: Selection, Succession, and Stabilization of Soil Microbial Consortia
Source: PubMed Central journal article supplement (PMC6517688; doi:10.1128/msystems.00055-19), 2019-05-14

**A**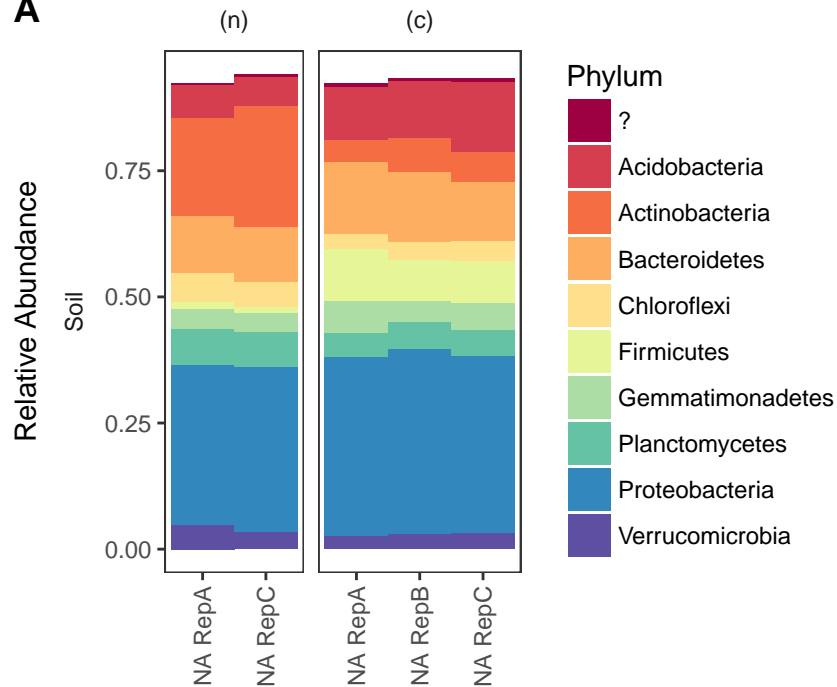**B**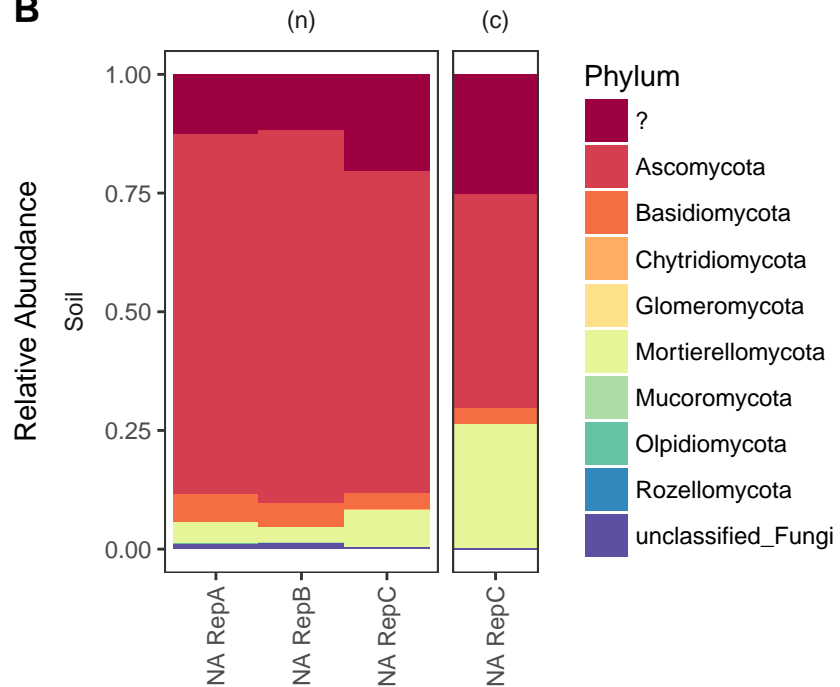**C**

16S OTUs

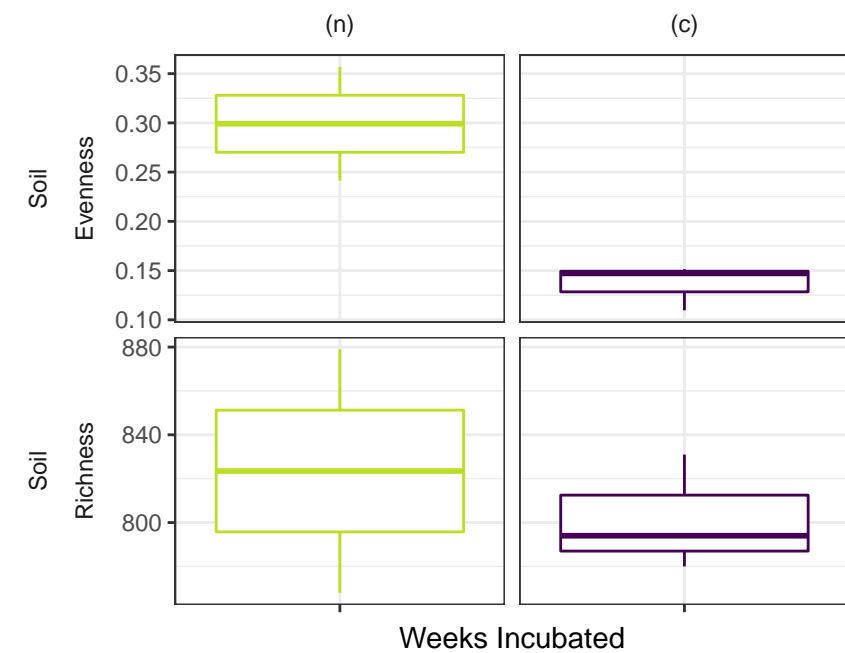**D**

ITS OTUs

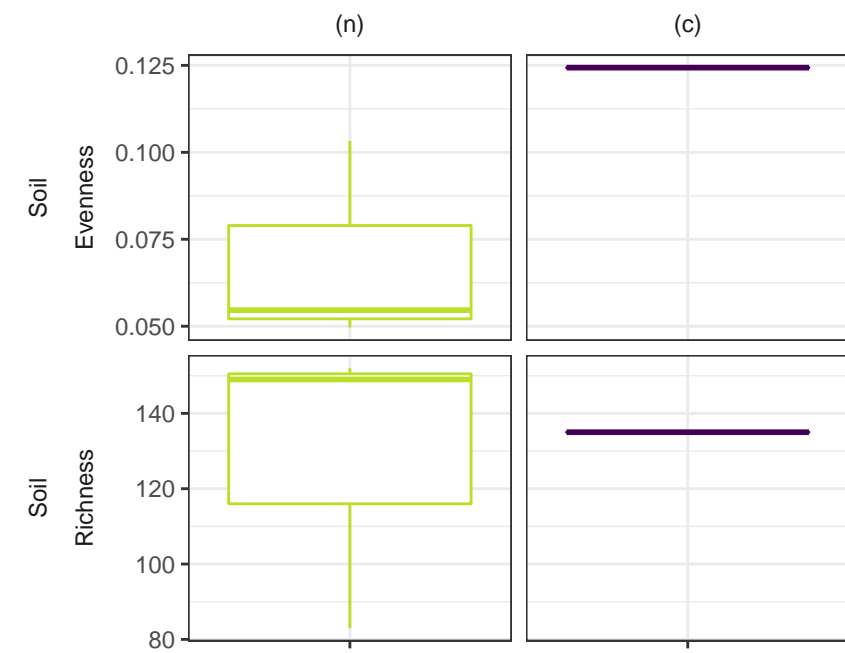

Supplement: mSystems.00055-19-sf001.pdf [file mSystems.00055-19-sf001.pdf]
