# Supplementary material for: Selection, Succession, and Stabilization of Soil Microbial Consortia
Source: PubMed Central journal article supplement (PMC6517688; doi:10.1128/msystems.00055-19), 2019-05-14

# 16S: The most abundant OTUs in negative controls also occur in other samples

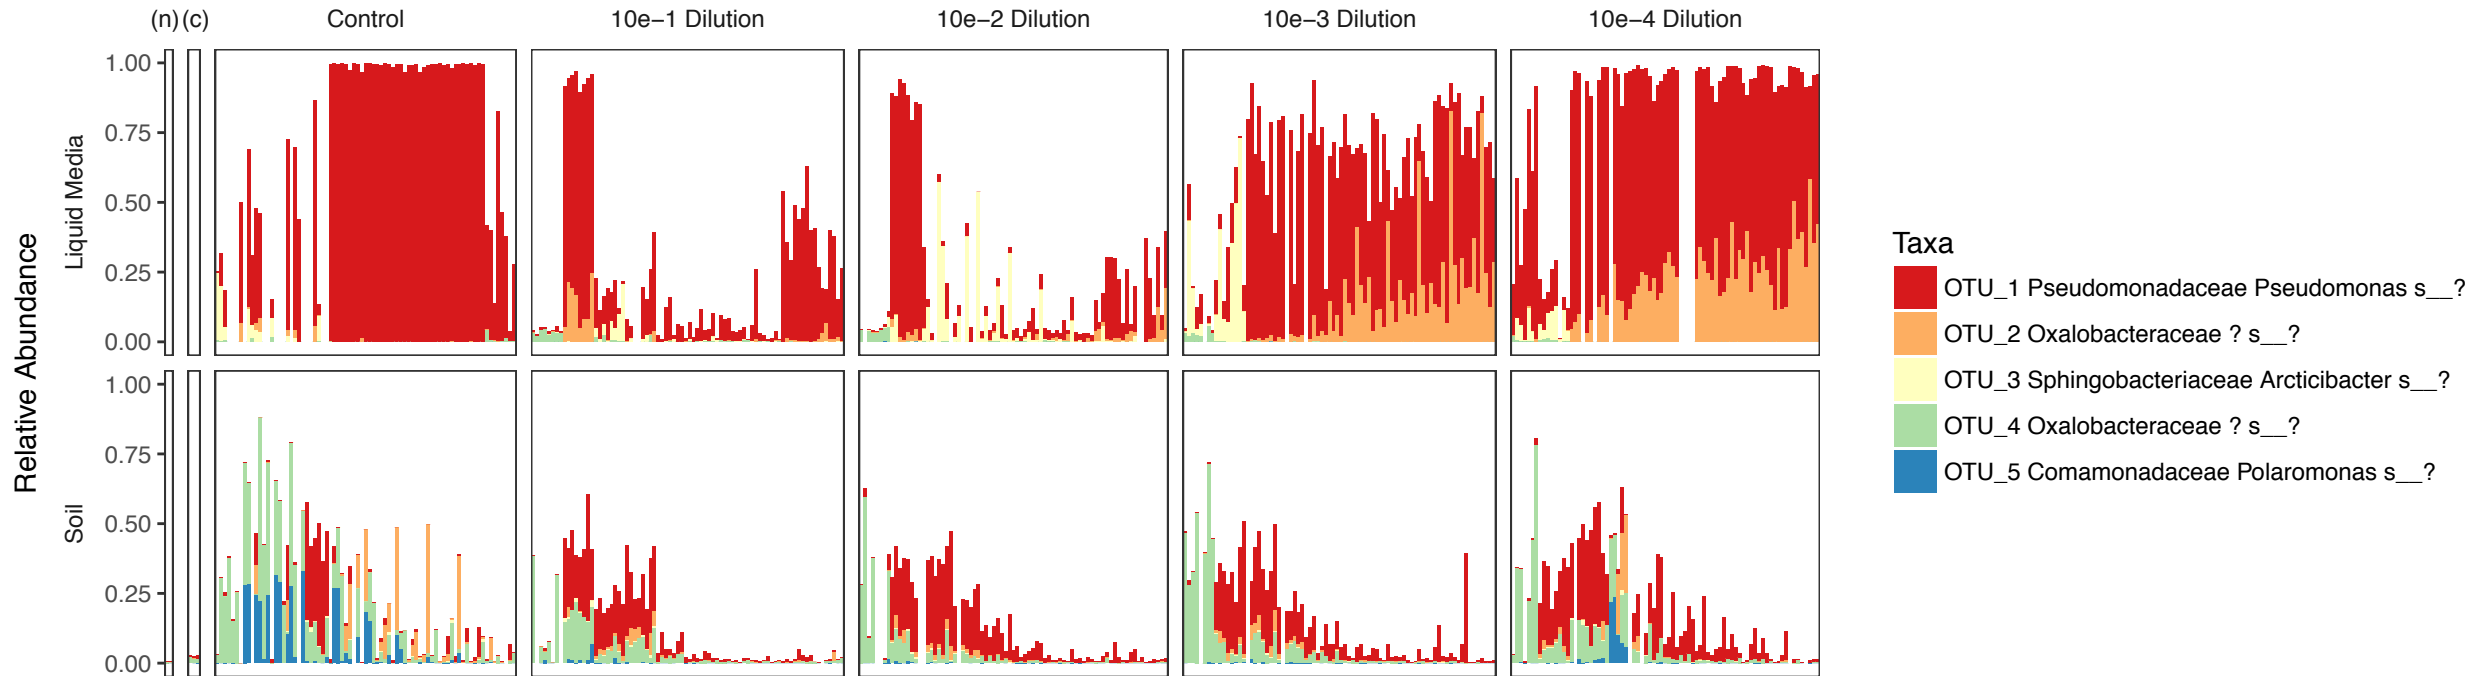

Supplement: mSystems.00055-19-sf003.pdf [file mSystems.00055-19-sf003.pdf]
