# Supplementary material for: Selection, Succession, and Stabilization of Soil Microbial Consortia
Source: PubMed Central journal article supplement (PMC6517688; doi:10.1128/msystems.00055-19), 2019-05-14

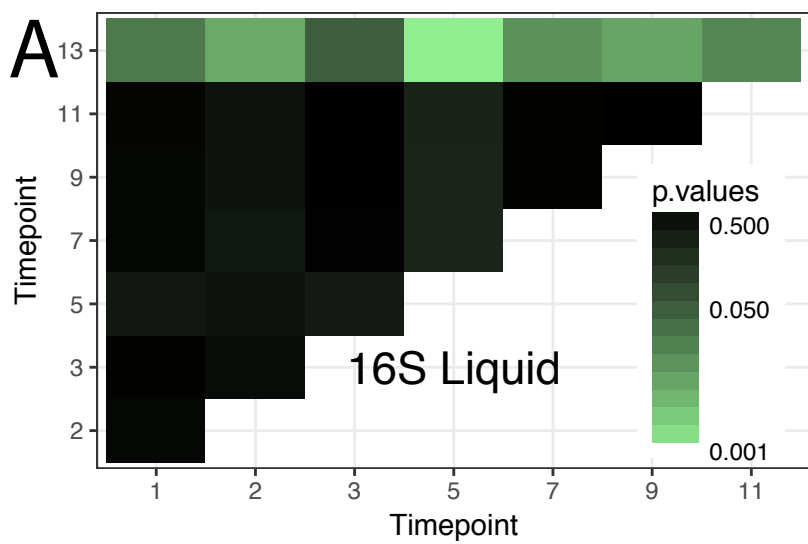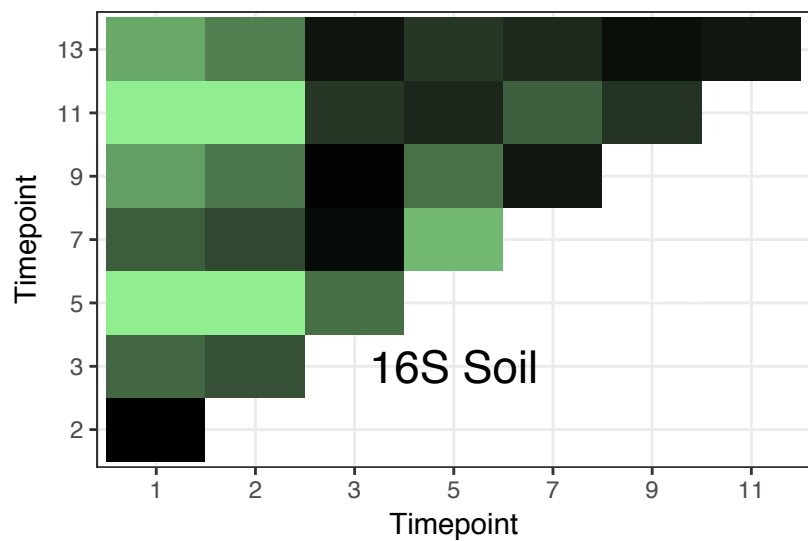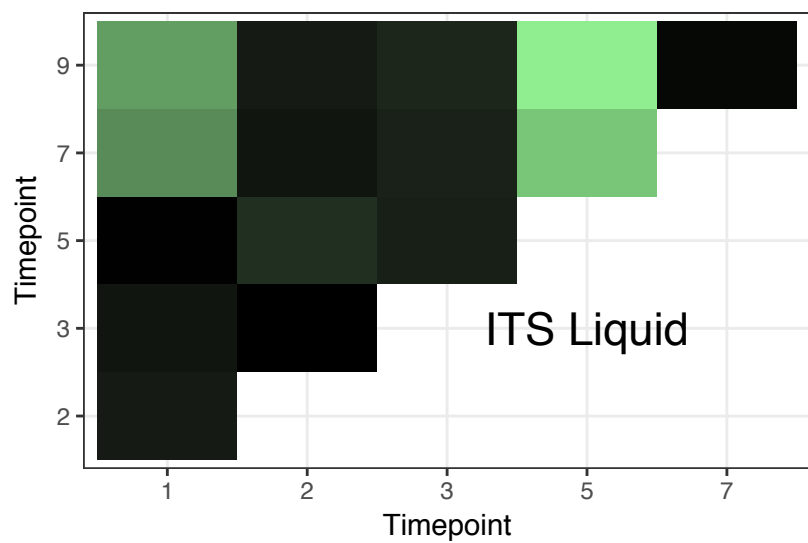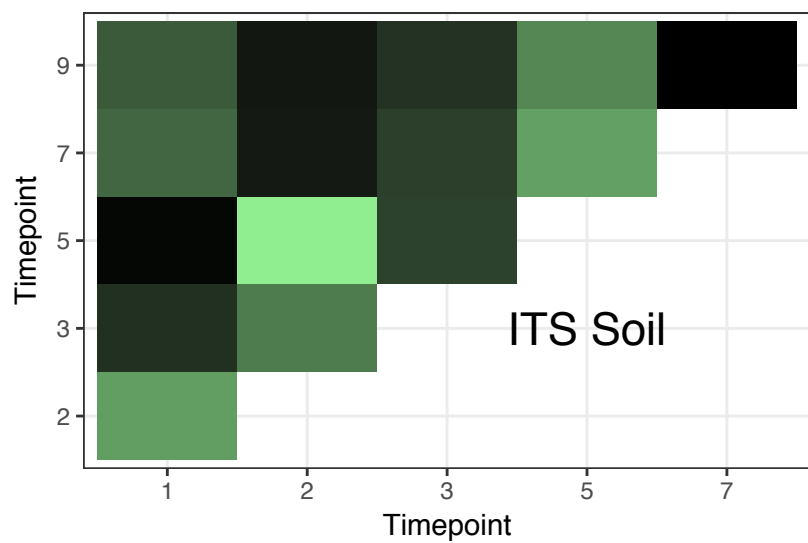

**B** 16S: between replicate variation

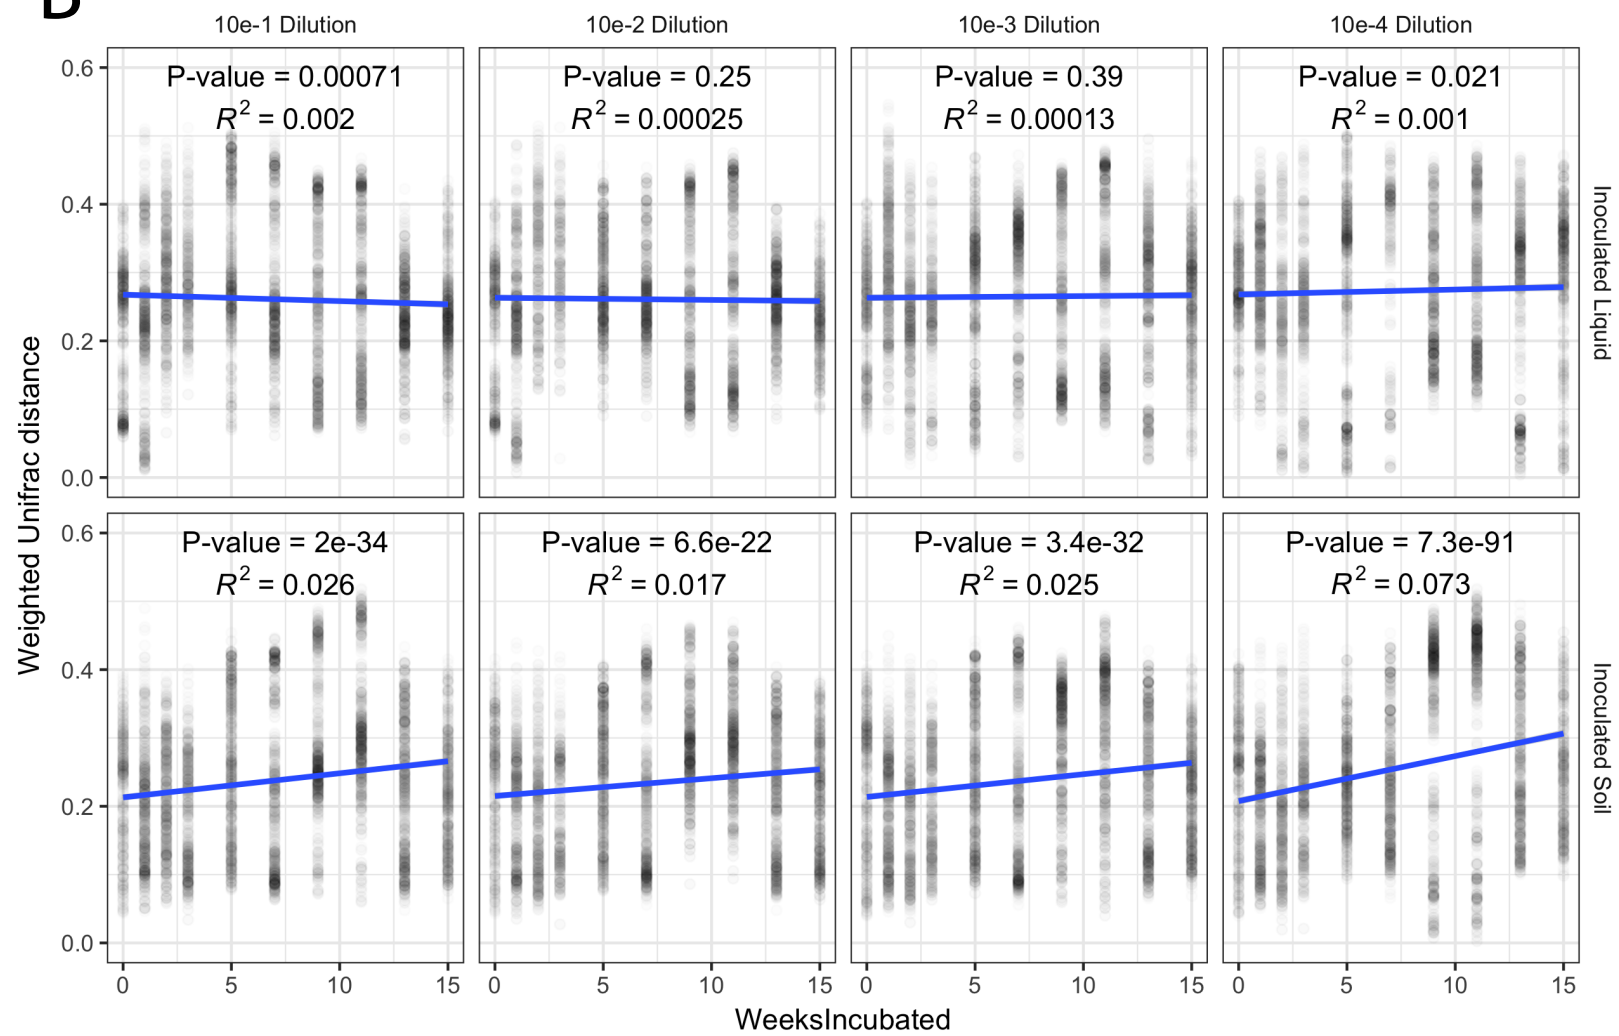

ITS: between replicate variation

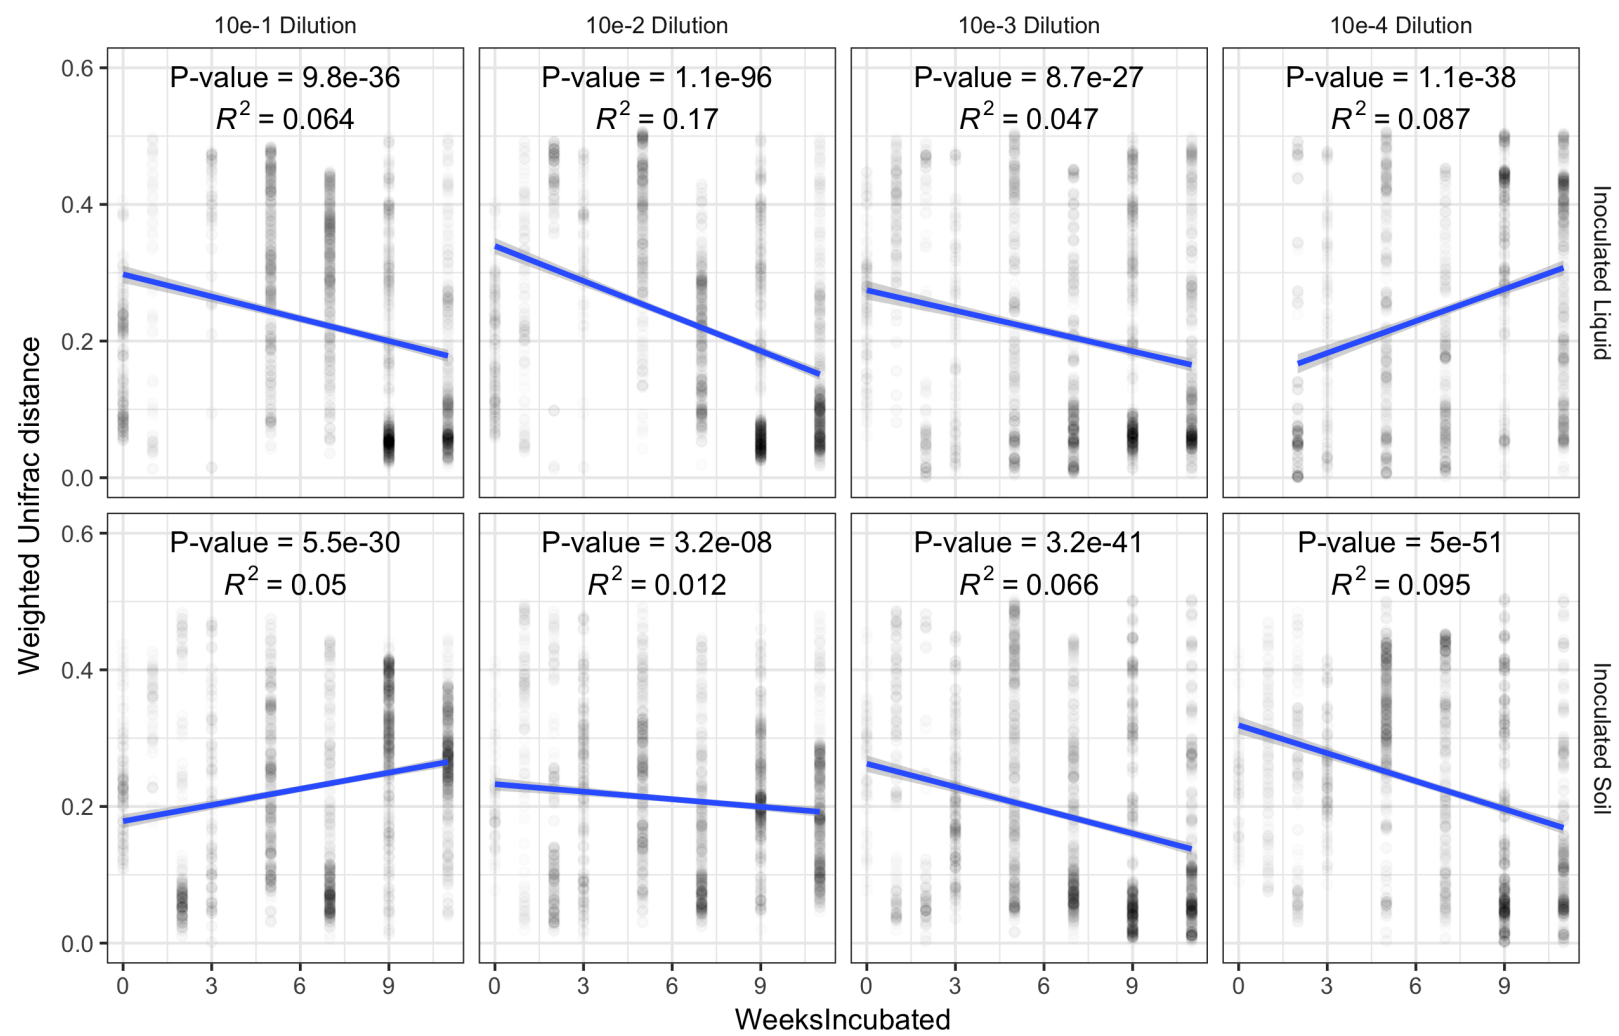

Supplement: mSystems.00055-19-sf004.pdf [file mSystems.00055-19-sf004.pdf]
